# Supplementary material
Source: PubMed Central journal article supplement (PMC3387528)
Supplement: NIHMS301882-supplement-1_si_001.pdf [file NIHMS301882-supplement-1_si_001.pdf]

## **SUPPORTING INFORMATION**

### **Targeted Cleavage of HIV RRE RNA by Rev-Coupled Transition Metal Chelates**

Jeff C. Joyner<sup>1</sup> and J. A. Cowan<sup>1,2,3\*</sup>

Contribution from <sup>1</sup>Evans Laboratory of Chemistry, Ohio State University, 100 West 18th Avenue, Columbus, Ohio 43210; <sup>2</sup>The Ohio State Biochemistry Program, 784 Biological Sciences 484 W. 12th Avenue, Columbus, Ohio 43210; and <sup>3</sup>MetalloPharm LLC, 1790 Riverstone Drive, Delaware, OH 43015

Correspondence to: Dr. J. A. Cowan, Evans Laboratory of Chemistry, Ohio State University, 100 West 18th Avenue, Columbus, Ohio 43210. tel: 614-292-2703, e-mail: [cowan@chemistry.ohio-state.edu](mailto:cowan@chemistry.ohio-state.edu)

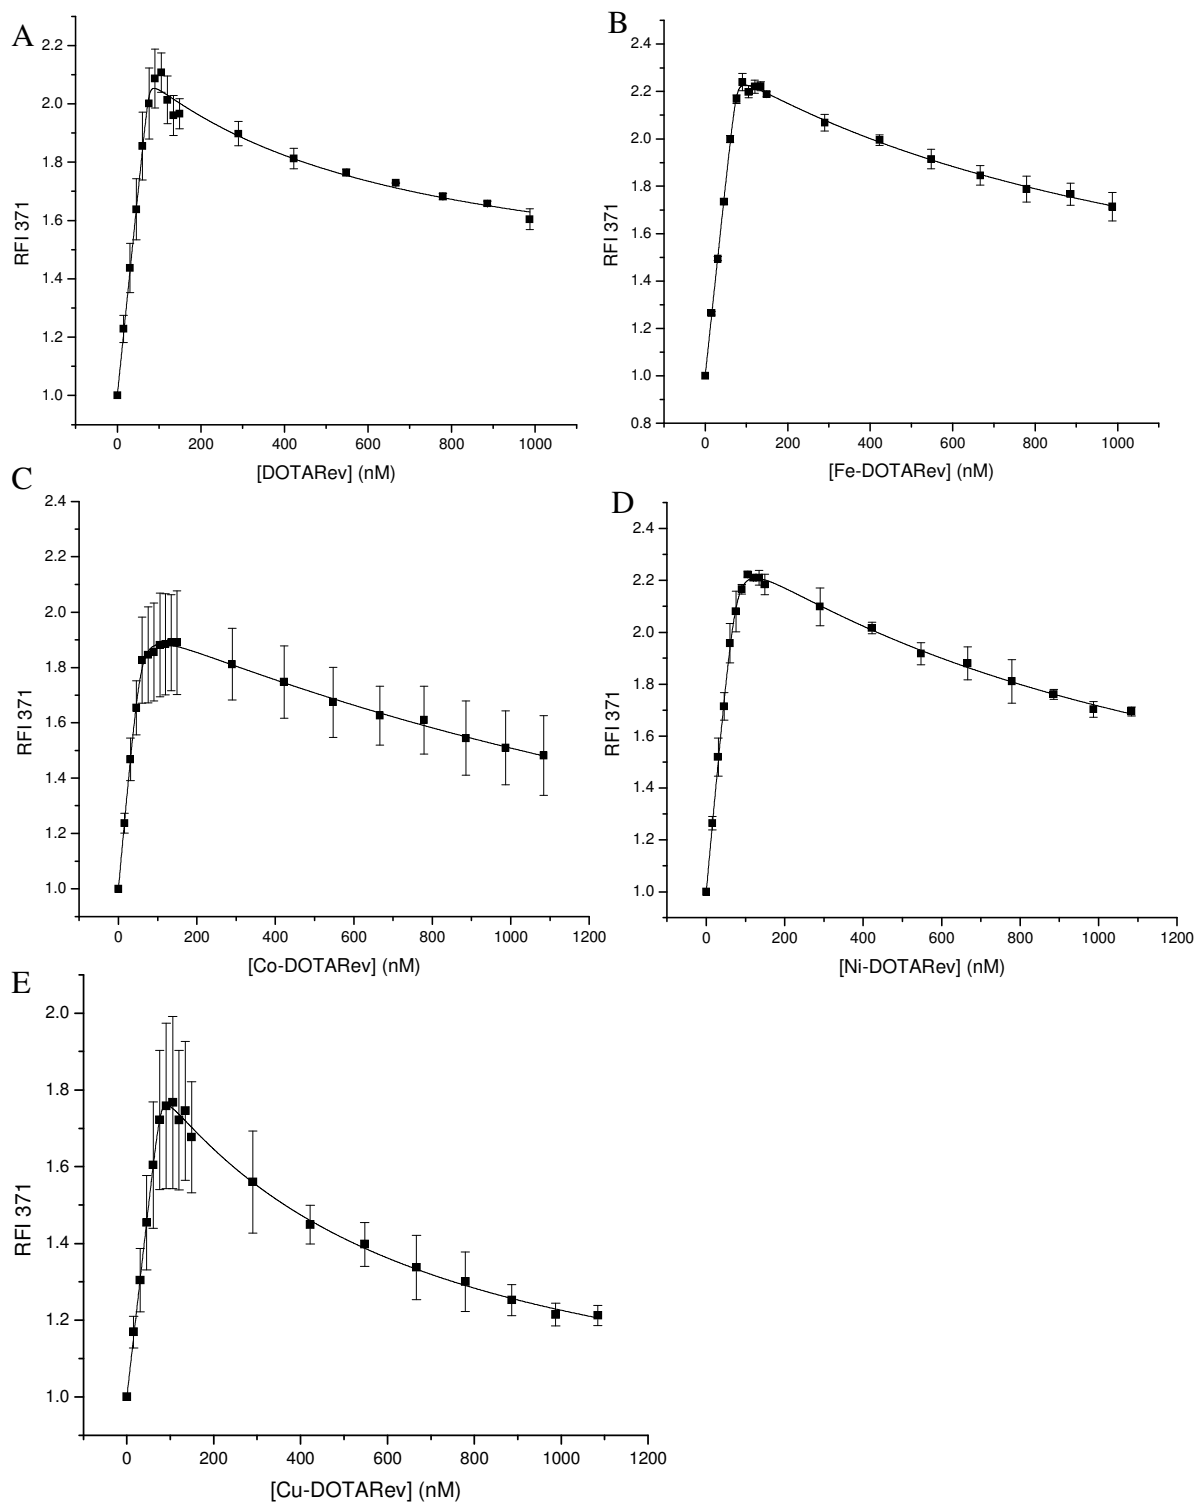

**Figure SM1.** Titration fluorescence response curves for binding of (A) DOTA-Rev, (B) Fe-DOTA-Rev, (C) Co-DOTA-Rev, (D) Ni-DOTA-Rev, and (E) Cu-DOTA-Rev to AP-RRE.

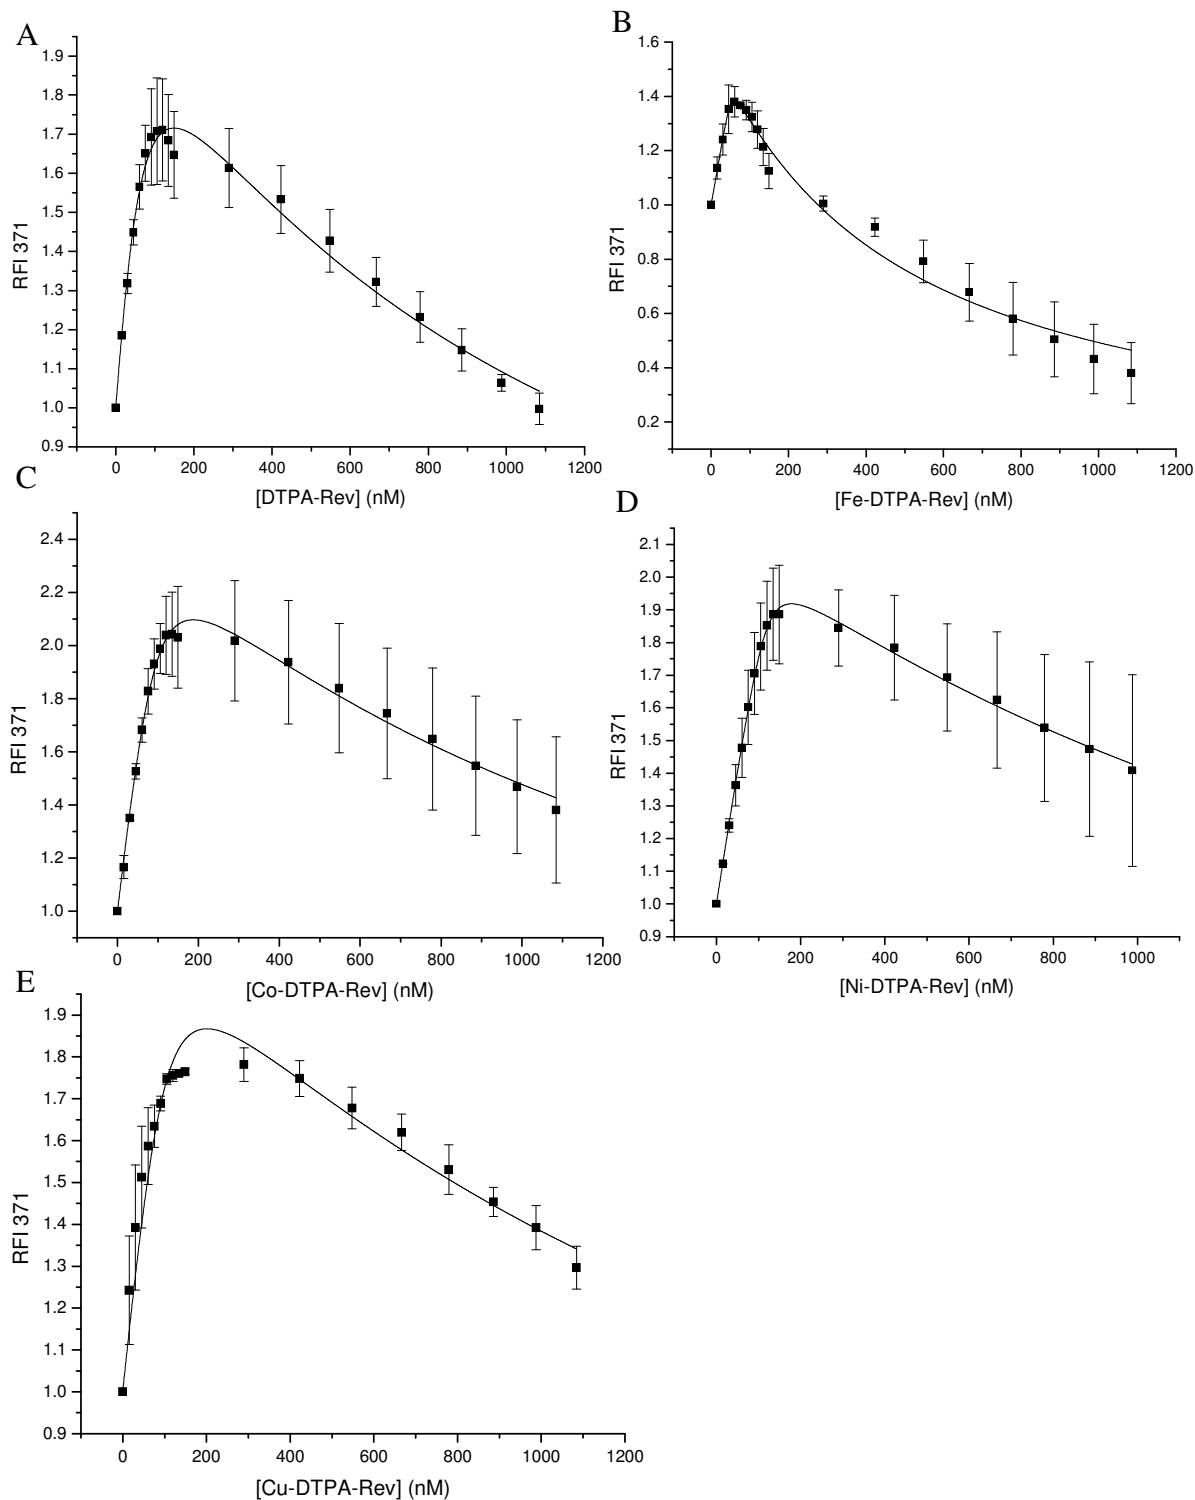

**Figure SM2.** Titration fluorescence response curves for binding of (A) DTPA-Rev, (B) Fe-DTPA-Rev, (C) Co-DTPA-Rev, (D) Ni-DTPA-Rev, and (E) Cu-DTPA-Rev to AP-RRE.

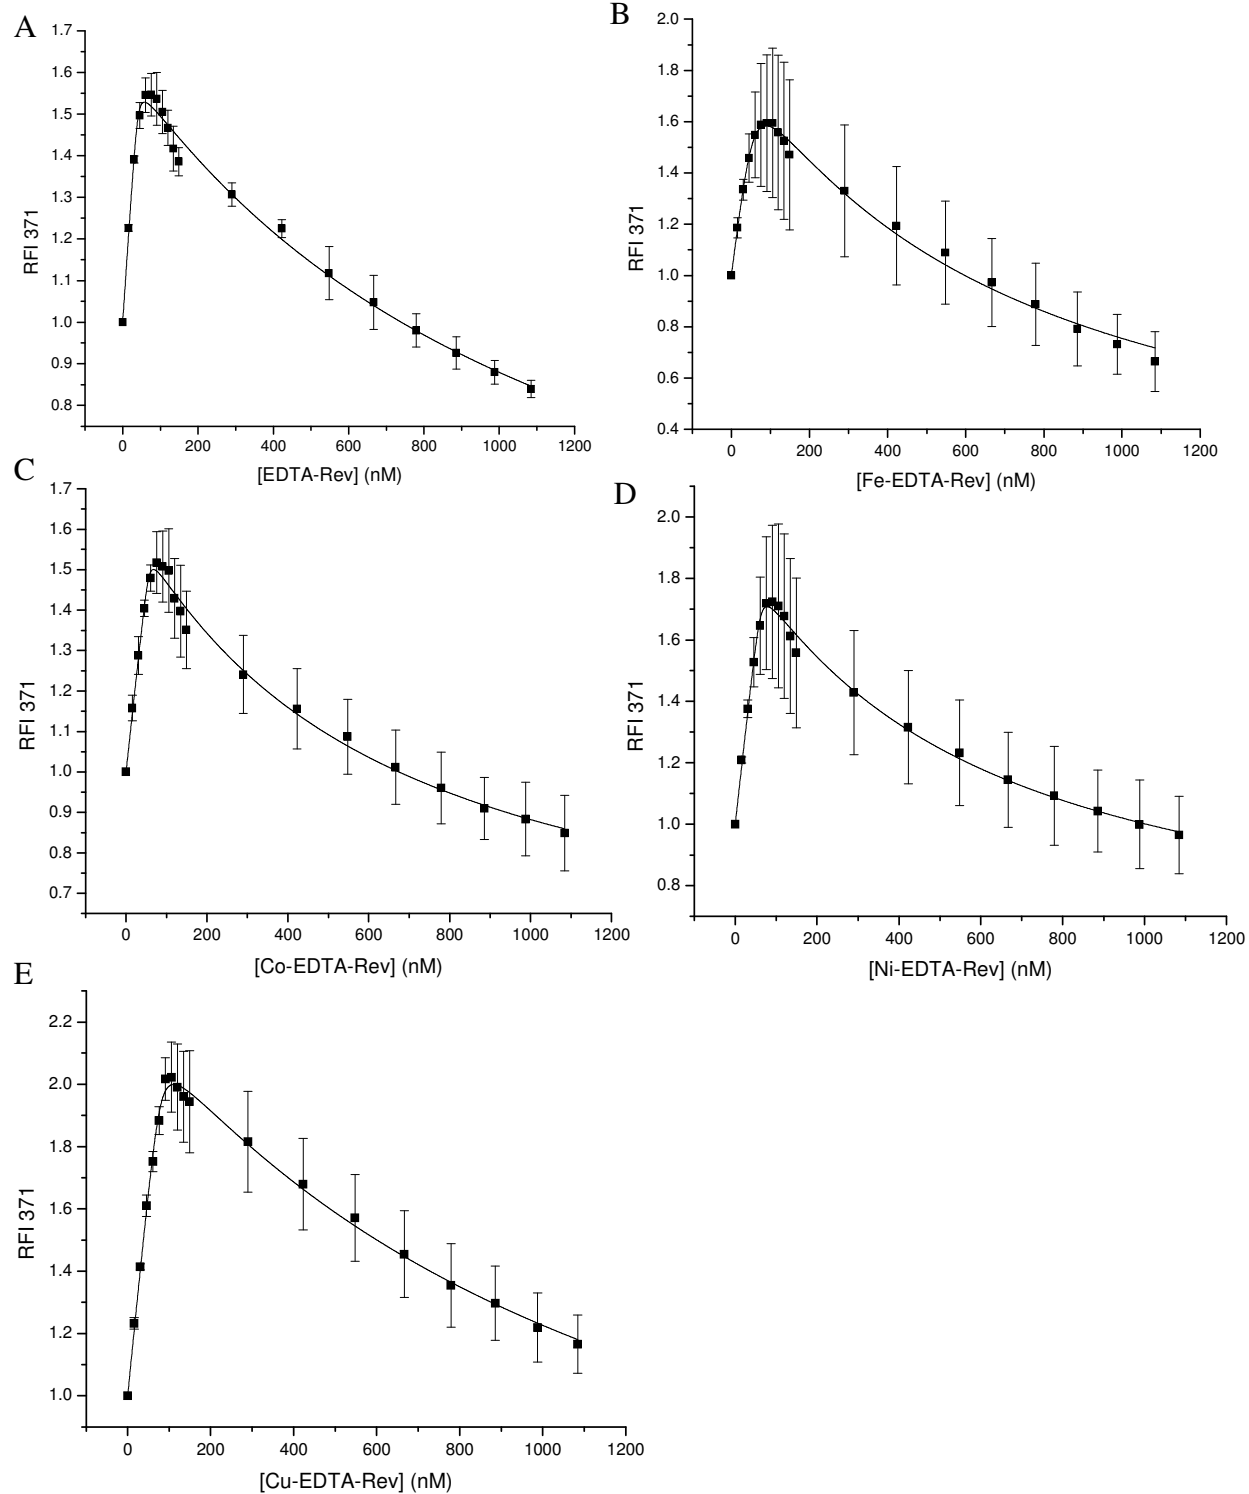

**Figure SM3.** Titration fluorescence response curves for binding of (A) EDTA-Rev, (B) Fe-EDTA-Rev, (C) Co-EDTA-Rev, (D) Ni-EDTA-Rev, and (E) Cu-EDTA-Rev to AP-RRE.

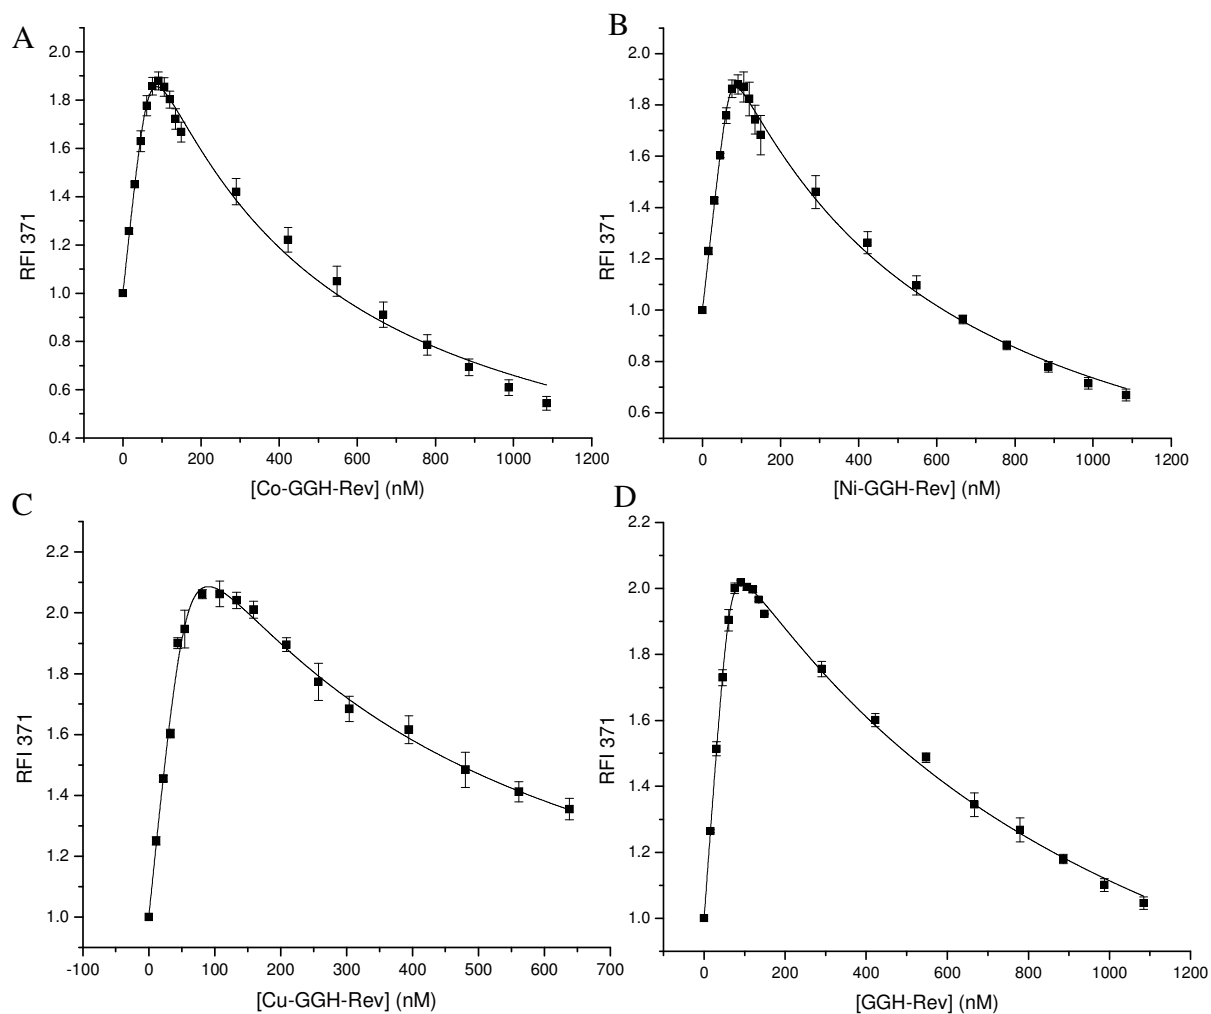

**Figure SM4.** Titration fluorescence response curves for binding of (A) Co-GGH-Rev, (B) Ni-GGH-Rev, (C) Cu-GGH-Rev and (D) GGH-Rev to the AP-RRE.

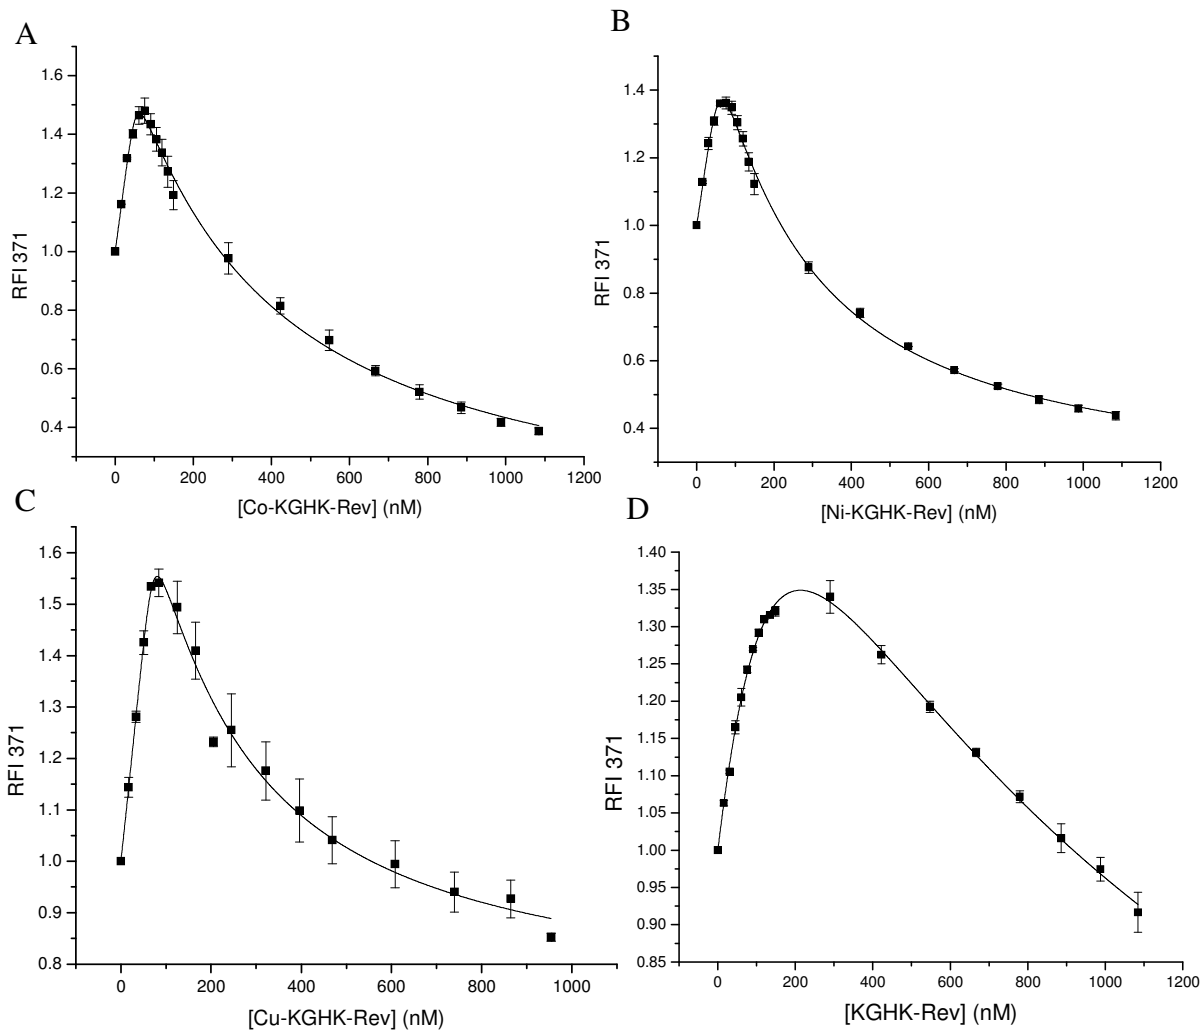

**Figure SM5.** Titration fluorescence response curves for binding of (A) Co-KGHK-Rev, (B) Ni-KGHK-Rev, (C) Cu-KGHK-Rev and (D) KGHK-Rev to the AP-RRE.

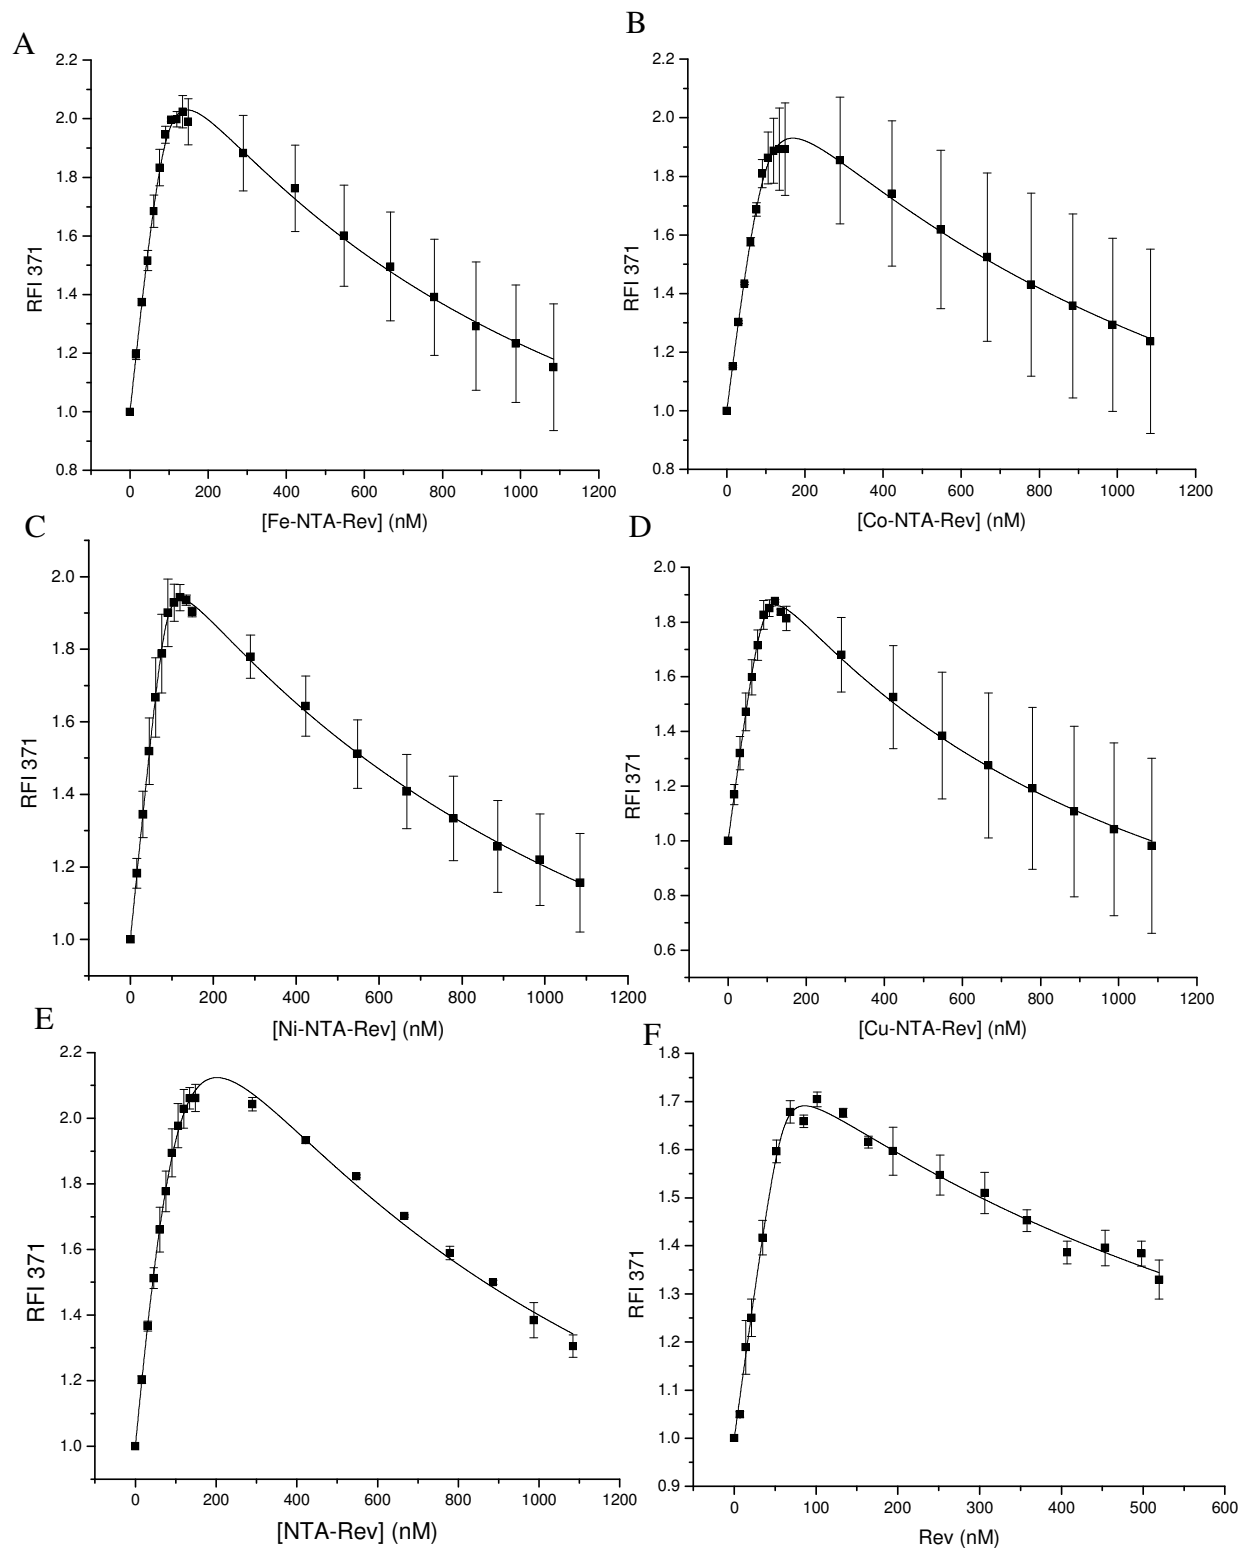

**Figure SM6.** Titration fluorescence response curves for binding of (A) Fe-NTA-Rev, (B) Co-NTA-Rev, (C) Ni-NTA-Rev, (D) Cu-NTA-Rev, (E) NTA-Rev, and (F) Rev peptide to the AP-RRE.

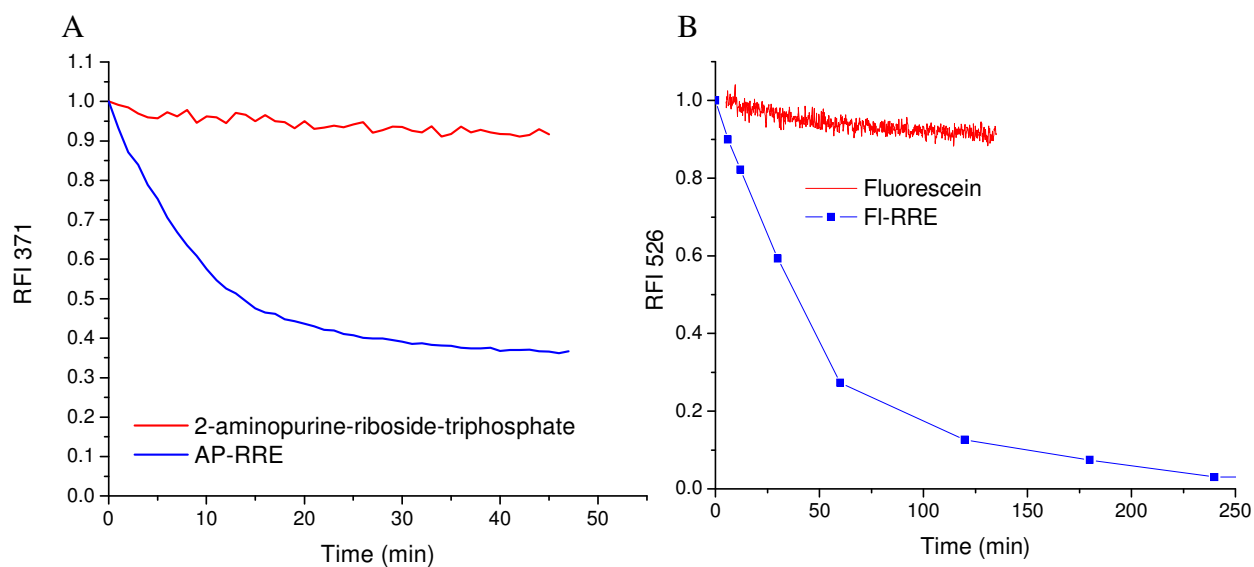

**Figure SM7.** Sample curves for reactions monitored by AP-RRE and FI-RRE. This experiment demonstrates that the observed signal changes upon reaction of AP-RRE or FI-RRE with M-chelate are indeed due to reaction with RNA, and not a result direct fluorophor quenching. The signal changes were only observed for RNA species. (A) Reactions contained 1  $\mu\text{M}$   $\text{CuCl}_2$ , 1 mM  $\text{H}_2\text{O}_2$ , and 500 nM of either AP-RRE or 2-aminopurine-riboside-triphosphate (AP-TP). (B) Reactions contained 1  $\mu\text{M}$   $\text{CuCl}_2$ , 1 mM  $\text{H}_2\text{O}_2$ , and 100 nM of either fluorescein (monitored via intrinsic fluorescein fluorescence in cuvette) or FI-RRE (monitored by PAGE).



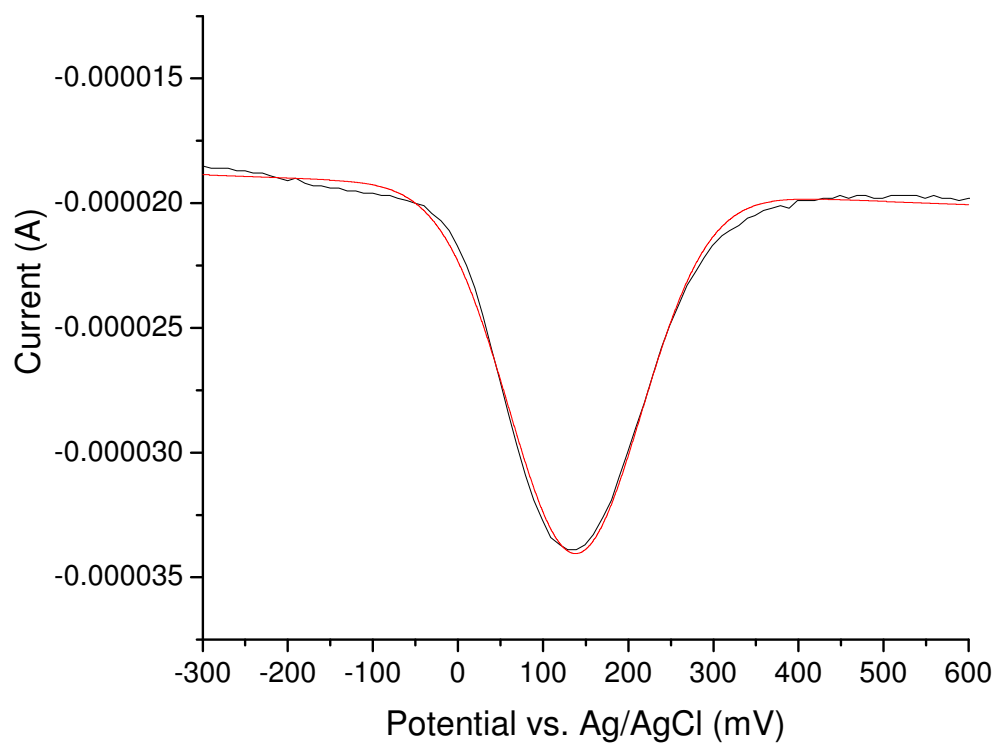

**Figure SM8.** Representative voltammogram for square wave voltammetry experiments, by which reduction potentials of M-chelates (Fe-DOTA shown here) were determined. Each reduction potential was later converted from potential vs. Ag/AgCl to potential vs. NHE.

| Complex        | $\epsilon_1$ ( $M^{-1}cm^{-1}$ ) | $\lambda_1$ (nm) | $\epsilon_2$ ( $M^{-1}cm^{-1}$ ) | $\lambda_2$ (nm) | $\log(\beta)$ of $M^{2+}$ -chelate |
|----------------|----------------------------------|------------------|----------------------------------|------------------|------------------------------------|
| <b>Cu-DOTA</b> | 3700 ± 20                        | 270              | 99 ± 5                           | 720              | 22.3 <sup>a</sup>                  |
| <b>Ni-DOTA</b> | 4610 ± 20                        | 240              |                                  |                  | 20 <sup>a</sup>                    |
| <b>Co-DOTA</b> | 1858 ± 8                         | 240              |                                  |                  | 20.2 <sup>a</sup>                  |
| <b>Fe-DOTA</b> | 164 ± 6                          | 400              |                                  |                  | 20.22 <sup>b</sup>                 |
| <b>Cu-DTPA</b> | 4830 ± 80                        | 290              | 100 ± 10                         | 700              | 21.5 <sup>a</sup>                  |
| <b>Ni-DTPA</b> | 4400 ± 200                       | 235              |                                  |                  | 20.1 <sup>a</sup>                  |
| <b>Co-DTPA</b> | 1100 ± 40                        | 240              |                                  |                  | 19.3 <sup>a</sup>                  |
| <b>Fe-DTPA</b> | 8100 ± 300                       | 260              |                                  |                  | 16 <sup>a</sup>                    |
| <b>Cu-EDTA</b> | 3300 ± 100                       | 270              | 100 ± 10                         | 730              | 18.8 <sup>c</sup>                  |
| <b>Ni-EDTA</b> | 330 ± 30                         | 240              |                                  |                  | 18.56 <sup>c</sup>                 |
| <b>Co-EDTA</b> | 700 ± 60                         | 240              |                                  |                  | 16.03 <sup>d</sup>                 |
| <b>Fe-EDTA</b> | 8900 ± 300                       | 250              |                                  |                  | 14.3 <sup>c</sup>                  |
| <b>Cu-GGH</b>  | 4180 ± 60                        | 250              | 108 ± 5                          | 525              | 15.9 <sup>e</sup>                  |
| <b>Ni-GGH</b>  | 10900 ± 300                      | 245              | 170 ± 40                         | 430              | 16 <sup>f</sup>                    |
| <b>Co-GGH</b>  | 2500 ± 50                        | 250              |                                  |                  | > 7 <sup>g</sup>                   |
| <b>Cu-KGHK</b> | 3930 ± 50                        | 250              | 116 ± 4                          | 525              | 16 <sup>e</sup>                    |
| <b>Ni-KGHK</b> | 12900 ± 200                      | 245              | 150 ± 30                         | 430              | 16 <sup>f</sup>                    |
| <b>Co-KGHK</b> | 6020 ± 70                        | 240              |                                  |                  | > 6 <sup>g</sup>                   |
| <b>Cu-NTA</b>  | 2790 ± 80                        | 250              | 50 ± 2                           | 700              | 12.68 <sup>c</sup>                 |
| <b>Ni-NTA</b>  | 200 ± 100                        | 232              |                                  |                  | 11.26 <sup>c</sup>                 |
| <b>Co-NTA</b>  | 440 ± 40                         | 240              | 30 ± 2                           | 520              | 10.6 <sup>c</sup>                  |
| <b>Fe-NTA</b>  | 6700 ± 100                       | 250              |                                  |                  | 8.84 <sup>c</sup>                  |

**Table SM1.** Summary of the experimentally determined extinction coefficients ( $\epsilon$ ) at specific wavelengths ( $\lambda$ ) and stability constants ( $\beta$ ) for the metal-chelates studied. Extinction coefficients were determined from linear fits of absorbance vs. metal-chelate concentration. <sup>a</sup> Anderegge et al. (2005).<sup>1</sup> <sup>b</sup> Martell et al. (1996).<sup>2</sup> <sup>c</sup> Furia (1972).<sup>3</sup> <sup>d</sup> Ogino et al. (1983).<sup>4</sup> <sup>e</sup> Lau et al. (1974).<sup>5</sup> <sup>f</sup> Long et al. (1999).<sup>6</sup> <sup>g</sup> Determined by metal titration, monitored by absorbance at the specified wavelength; this technique provided a lower limit for the stability constant.

| Complex            | $\epsilon_1$ ( $M^{-1}cm^{-1}$ ) | $\lambda_1$ (nm) | $\epsilon_2$ ( $M^{-1}cm^{-1}$ ) | $\lambda_2$ (nm) |
|--------------------|----------------------------------|------------------|----------------------------------|------------------|
| <b>Cu-DOTA-Rev</b> | 3600 $\pm$ 300                   | 270              | 170 $\pm$ 40                     | 720              |
| <b>Ni-DOTA-Rev</b> | 3700 $\pm$ 200                   | 240              |                                  |                  |
| <b>Co-DOTA-Rev</b> | 2000 $\pm$ 300                   | 240              |                                  |                  |
| <b>Fe-DOTA-Rev</b> | 1000 $\pm$ 200                   | 400              |                                  |                  |
| <b>Cu-DTPA-Rev</b> | 3810 $\pm$ 90                    | 290              | 70 $\pm$ 10                      | 700              |
| <b>Ni-DTPA-Rev</b> | 2900 $\pm$ 700                   | 235              |                                  |                  |
| <b>Co-DTPA-Rev</b> | 1300 $\pm$ 300                   | 240              |                                  |                  |
| <b>Fe-DTPA-Rev</b> | 10000 $\pm$ 1000                 | 260              |                                  |                  |
| <b>Cu-EDTA-Rev</b> | 4200 $\pm$ 200                   | 270              | 150 $\pm$ 40                     | 730              |
| <b>Ni-EDTA-Rev</b> | 2100 $\pm$ 400                   | 240              |                                  |                  |
| <b>Co-EDTA-Rev</b> | 1200 $\pm$ 200                   | 240              |                                  |                  |
| <b>Fe-EDTA-Rev</b> | 11000 $\pm$ 2000                 | 250              |                                  |                  |
| <b>Cu-GGH-Rev</b>  | 3460 $\pm$ 80                    | 250              | 134 $\pm$ 6                      | 525              |
| <b>Ni-GGH-Rev</b>  | 9100 $\pm$ 700                   | 245              | 130 $\pm$ 20                     | 430              |
| <b>Co-GGH-Rev</b>  | 2800 $\pm$ 400                   | 250              |                                  |                  |
| <b>Cu-KGHK-Rev</b> | 3720 $\pm$ 60                    | 250              | 106 $\pm$ 6                      | 525              |
| <b>Ni-KGHK-Rev</b> | 11200 $\pm$ 600                  | 245              | 160 $\pm$ 20                     | 430              |
| <b>Co-KGHK-Rev</b> | 7200 $\pm$ 900                   | 240              |                                  |                  |
| <b>Cu-NTA-Rev</b>  | 3000 $\pm$ 200                   | 250              | 60 $\pm$ 2                       | 700              |
| <b>Ni-NTA-Rev</b>  | 100 $\pm$ 100                    | 232              |                                  |                  |
| <b>Co-NTA-Rev</b>  | 2800 $\pm$ 400                   | 240              | 40 $\pm$ 10                      | 520              |
| <b>Fe-NTA-Rev</b>  | 4000 $\pm$ 300                   | 250              |                                  |                  |

**Table SM2.** Summary of the experimentally determined extinction coefficients ( $\epsilon$ ) at specific wavelengths ( $\lambda$ ) for the metal-chelate-Rev complexes studied. Extinction coefficients were determined from linear fits of absorbance vs. metal-chelate-Rev concentration. Absorbance by the chelate-Rev peptides (primarily due to the internal tryptophan residue and amides) was subtracted from the absorbance by the metal-chelate-Rev complexes, so that the reported extinction coefficients reflect only the metal-chelate portion of the metal-chelate-Rev complexes, allowing comparison of the extinction coefficients of the metal-chelate-Rev complexes with the respective metal-chelates lacking Rev.

|             | <b>Fe(II)</b> | <b>Co(II)</b> | <b>Ni(II)</b> | <b>Cu(II)</b> |
|-------------|---------------|---------------|---------------|---------------|
| <b>DOTA</b> | 0.077 ± 0.002 | 0.073 ± 0.001 | < 0.001       | 0.104 ± 0.001 |
| <b>DTPA</b> | 0.15 ± 0.02   | 0.45 ± 0.03   | 0.15 ± 0.01   | 0.2 ± 0.1     |
| <b>EDTA</b> | 0.123 ± 0.006 | 0.22 ± 0.03   | 0.41 ± 0.01   | 0.43 ± 0.01   |
| <b>GGH</b>  |               | 0.07 ± 0.01   | 0.240 ± 0.005 | 0.218 ± 0.004 |
| <b>KGHK</b> |               | 0.103 ± 0.001 | 0.122 ± 0.002 | 0.315 ± 0.006 |
| <b>NTA</b>  | 0.110 ± 0.001 | 0.085 ± 0.001 | 0.056 ± 0.001 | 0.39 ± 0.02   |

**Table SM3.** Summary of observed rates from the AP-fluorescence assay for RRE RNA modification (nM/min) by metal-chelates lacking Rev (also illustrated in Figure 4 of the manuscript).

## **SM References**

- (1) Anderegg, G.; Arnaud-Neu, F.; Delgado, R.; Felcman, J.; Popov, K. *Pure Appl. Chem.* **2005**, *77*, 1445.
- (2) Martell, A. E.; Motekaitis, R. J.; Chen, D.; Hancock, R. D.; McManus, D. *Can. J. Chem.* **1996**, *74*, 1872.
- (3) Furia, T. E. *CRC Handbook of Food Additives*; 2nd ed., 1972; Vol. 1.
- (4) Ogino, H.; Ogino, K. *Inorg. Chem.* **1982**, *22*, 2208.
- (5) Lau, S.-J.; Kruck, T. P. A.; Sarkar, B. *J. Biol. Chem.* **1974**, *249*, 5878.
- (6) Long, E. C. *Acc. Chem. Res.* **1999**, *32*, 827.

## **Reference (1) from main text**

- (1) Hacein-Bey-Abina, S.; Kalle, C. V. S., M.; M.P., M.; Wulffraat, N.; Leboulch, P.; Lim, A.; Osborne, C. S.; Pawliuk, R.; Morillon, E.; Sorenson, R.; Forster, A.; Fraser, P.; Cohen, J. I.; de Saint Basile, G.; Alexander, I.; Wintergest, U.; Frebourg, T.; Aurias, A.; Stoppa-Lyonnet, D.; Romana, S.; Radford-Weiss, I.; Gross, F.; Valensi, F.; Delabesse, E.; Macintyre, E.; Sigaux, F.; Soulier, J.; Leiva, L. E.; Wissler, M.; Prinz, C.; Rabbitts, T. H.; Le Deist, F.; Fischer, A.; Cavazzana-Calvo, M. *Science* **2003**, *302*, 415.
